# Supplementary material for: How protein structure affects redox reactivity: example of Human centrin 2
Source: Royal Society of Chemistry journal article supplement (doi:10.1039/c4cp03536d), 2014-01-01
Supplement: c4cp03536d1.pdf [file c4cp03536d1.pdf]

## How protein structure affects redox reactivity: example of Human centrin 2.

Abdeslam Et Taouil, Emilie Brun, Patricia Duchambon, Yves Blouquit, Manon Gilles, Emmanuel Maisonhaute\*, Cécile Sicard-Roselli\*

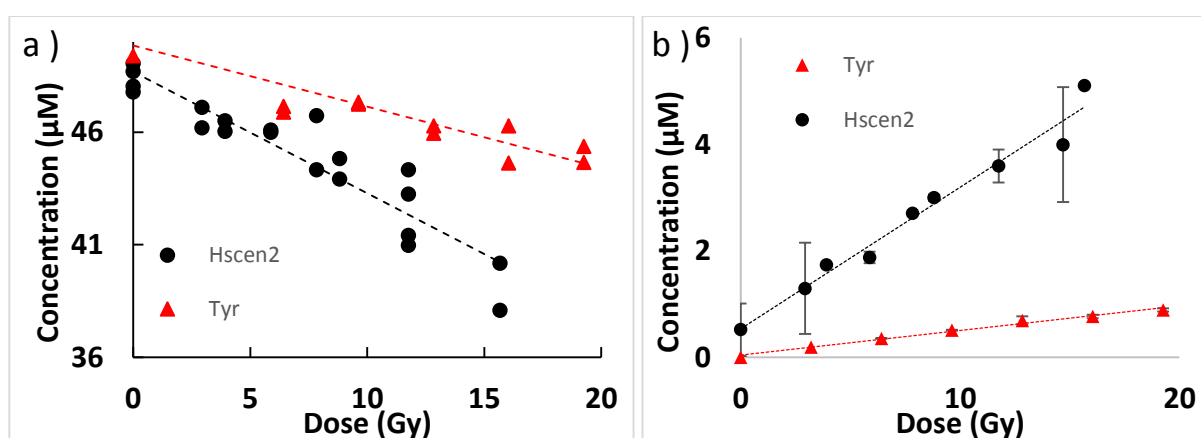

**Figure S1.** a ) Hscen 2 and Tyrosine concentration evolution as a function of the irradiation dose determined by liquid chromatography. Yield determined:  $G_{(-\text{Hscen2})} = 0.57 \pm 0.05 \mu\text{mol}\cdot\text{J}^{-1}$ ,  $G_{(-\text{Tyr})} = 0.27 \pm 0.04 \mu\text{mol}\cdot\text{J}^{-1}$ . b ) Dimer concentration evolution as a function of the irradiation dose determined by liquid chromatography. Yield determined:  $G_{(\text{Hscen2Dimer})} = 0.26 \pm 0.02 \mu\text{mol}\cdot\text{J}^{-1}$ ,  $G_{(\text{TyrDimer})} = 0.046 \pm 0.002 \mu\text{mol}\cdot\text{J}^{-1}$ .

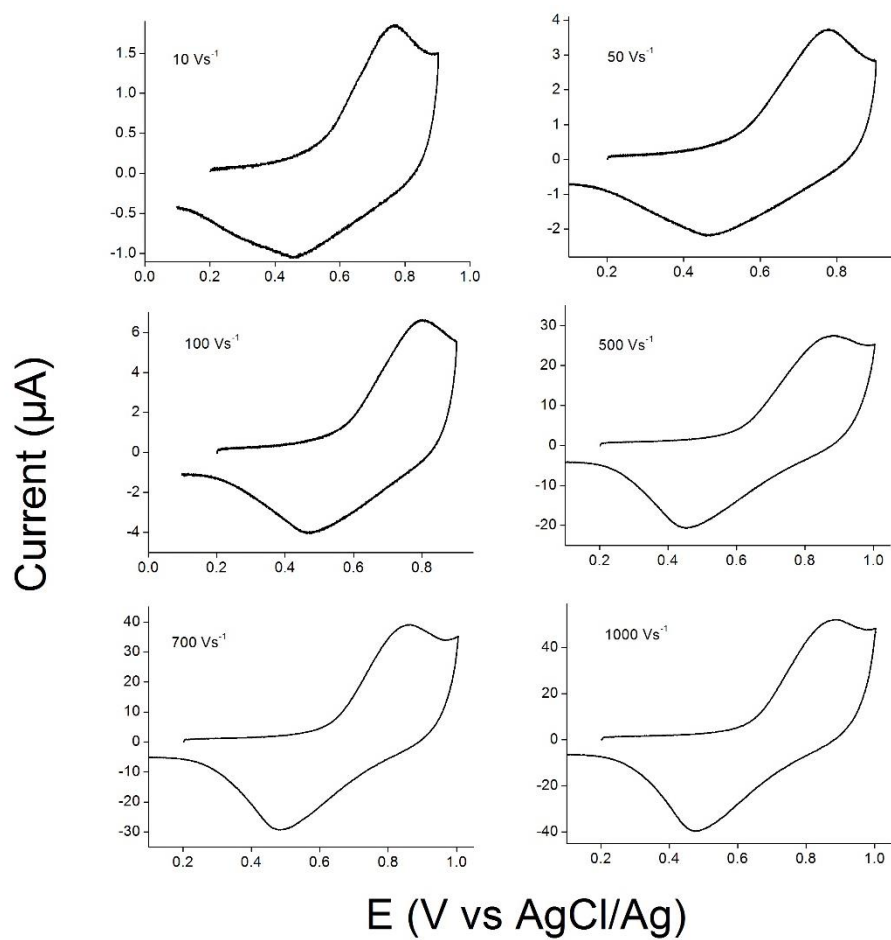

**Figures S2.** Cyclic voltammograms of Hscen2 (0.2 mM) in 0.2 M NaCl aqueous solution at different scan rates onto a 125 μm diameter gold electrode.

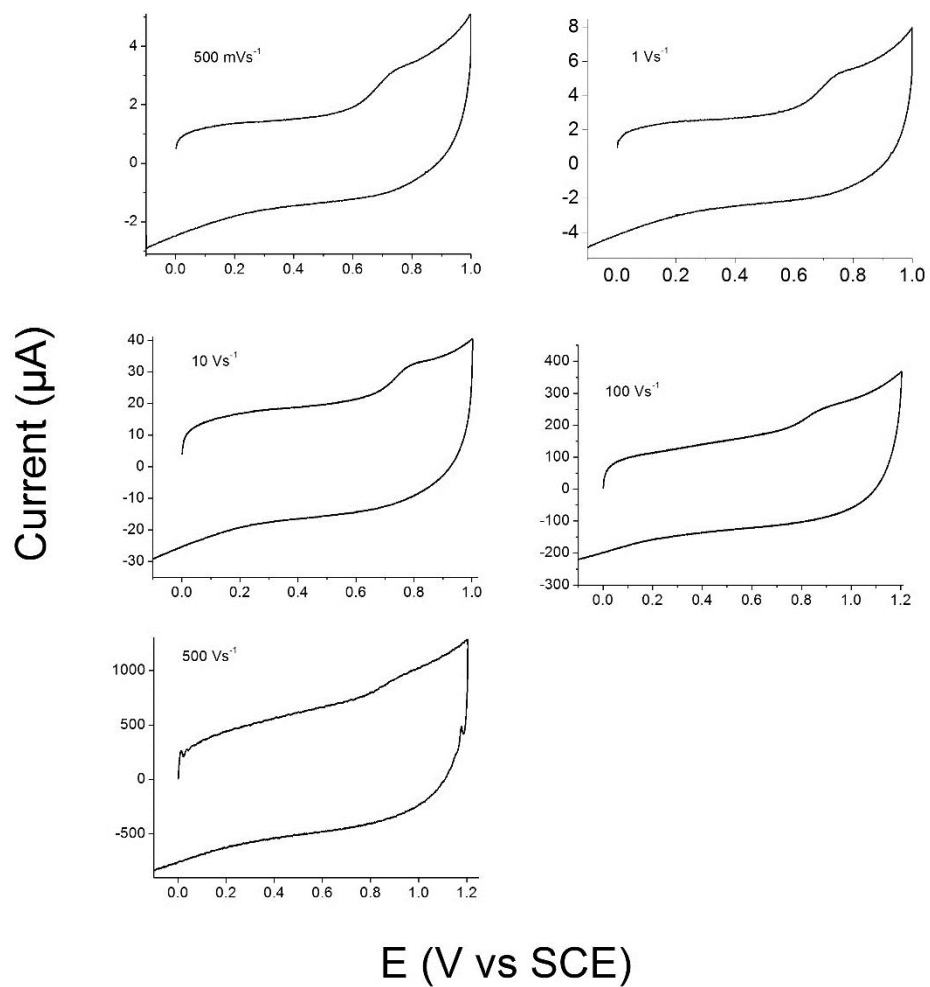

**Figure S3.** Cyclic voltammograms of 0.2 mM tyrosine in 0.5 M LiNO<sub>3</sub> aqueous solution on a 1 mm diameter glassy carbon electrode at different scan rates.

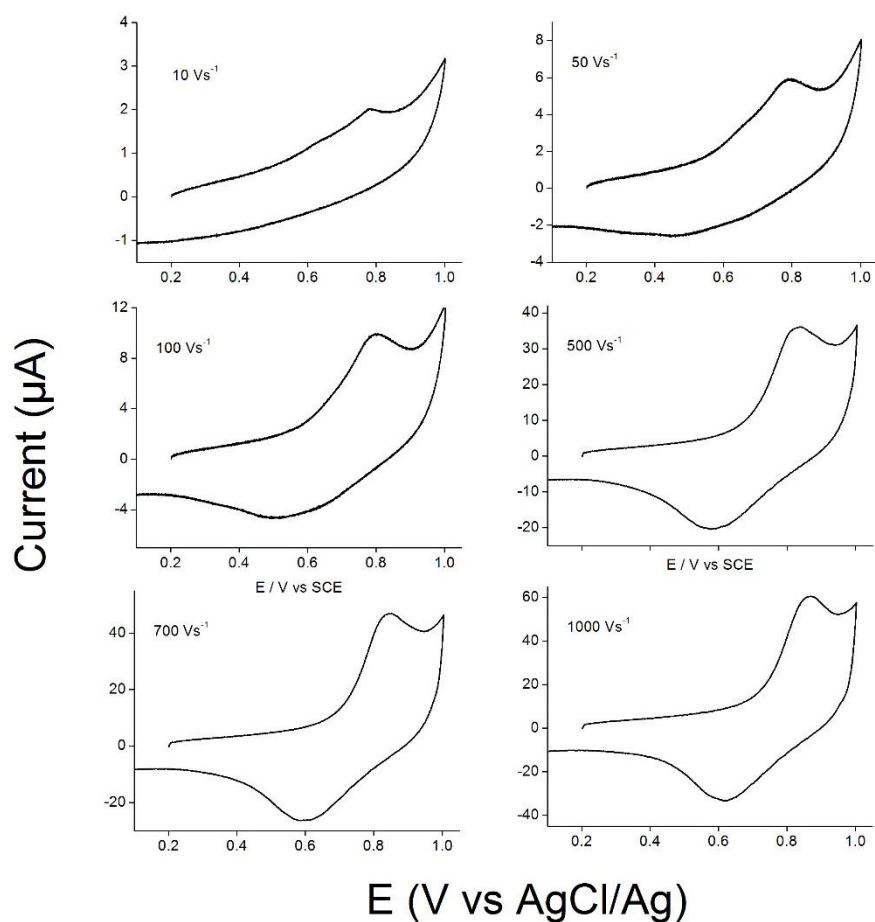

**Figure S4.** Cyclic voltammograms of  $\Delta 25$  Human centrin 2 (0.2 mM) in 0.2 M NaCl aqueous solution at different scan rates onto a 125  $\mu\text{m}$  diameter gold electrode.

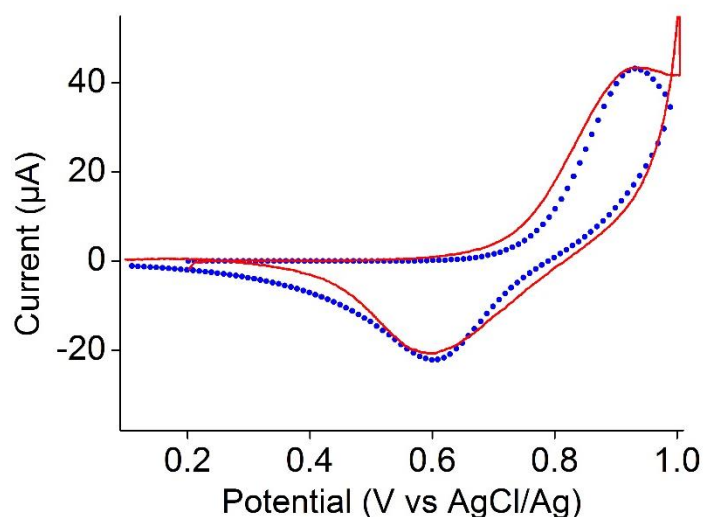

**Figure S5.** Experimental (solid line) and simulated cyclic voltammograms (dots) of  $\Delta 25$  Human Centrin 2 (0.2 mM) in 0.2 M NaCl aqueous solution at 1000  $\text{Vs}^{-1}$  onto a 125  $\mu\text{m}$  diameter gold electrode. The background current is subtracted. Simulation parameters:  $E^0 = 0.765$  V vs AgCl/Ag diffusion coefficient  $D_{\Delta 25} = 8.2 \times 10^{-7}$   $\text{cm}^2 \text{s}^{-1}$ ,  $k_{\text{dim}} = 1.45 \times 10^4$   $\text{L mol}^{-1} \text{s}^{-1}$ , layer thickness = 180 nm,  $[\Delta 25] = 59$  mM, pH = 7.5.

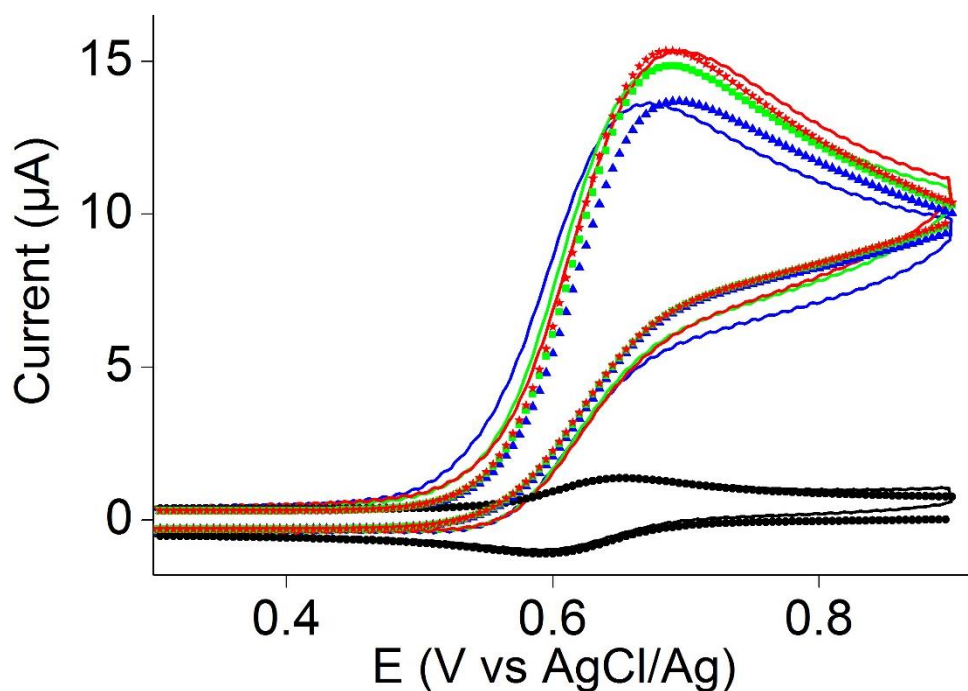

**Figure S6.** Redox catalysis of 0.1 mM tyrosine in the presence of 11  $\mu\text{M}$   $\text{Os}(\text{bpy})^{2+}$  ( $E^{\circ}_{\text{Os}(\text{bpy})^{2+/3+}} = 623$  mV/AgCl/Ag;  $E^{\circ}_{\text{Tyrosine}} = 730$  mV/AgCl/Ag;  $D_{\text{Os}(\text{bpy})^{2+/3+}} = 6.10^{-6}$   $\text{cm}^2\cdot\text{s}^{-1}$ ;  $D_{\text{Tyrosine}} = 4.10^{-5}$   $\text{cm}^2\cdot\text{s}^{-1}$ ;  $k_{\text{dimerization}} = 10^7$   $\text{M}^{-1}\cdot\text{s}^{-1}$ ;  $K_{\text{eq}} = 1.5.10^5$ ). Phosphate buffer concentrations of 10 (blue), 50 (green) and 100 (red) mM,  $k_{\text{app}}$  were found to be  $3.5 \times 10^6$ ,  $4.5 \times 10^6$  and  $5.1 \times 10^6$   $\text{M}^{-1}\cdot\text{s}^{-1}$ , respectively. The fits are performed taking a diffusion coefficient  $D_{\text{Tyrosine}}$  of  $4 \times 10^{-5}$   $\text{cm}^2\cdot\text{s}^{-1}$  in line with Fecenko *et al.*<sup>1</sup> Such high value nevertheless seems overestimated in comparison with the one published recently by Wiegang *et al.*<sup>2</sup> Nevertheless, introducing a larger  $k_{\text{app}}$  and a smaller  $D_{\text{tyrosine}}$  did not lead to a correct fit since then the system shifted to the "total catalysis" zone as described by Saveant.<sup>3</sup> Revisiting the model of Fecenko *et al.* was however beyond the scope of this study.

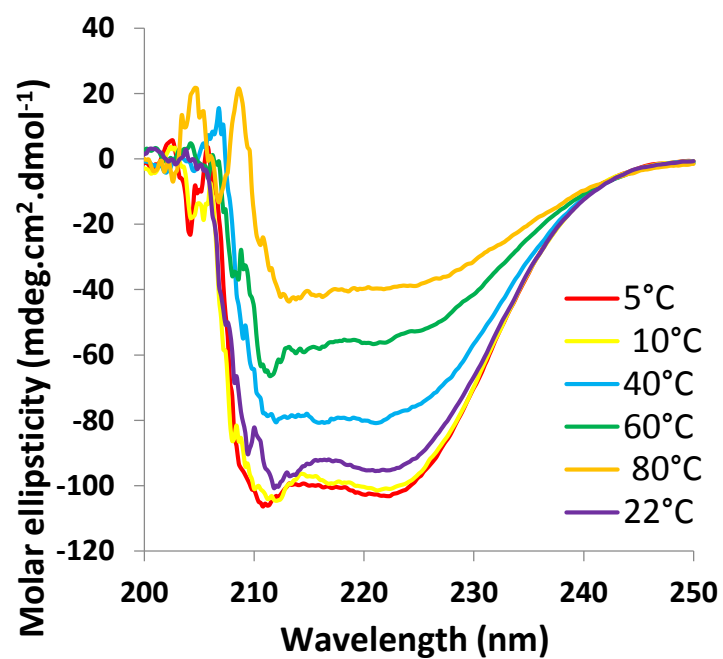

**Figure S7.** Hscen2 circular dichroism signal evolution as a function of the temperature.

#### References.

1. C. J. Fecenko, T. J. Meyer and H. H. Thorp, *J. Am. Chem. Soc.*, 2006, 128, 11020-11021.
2. Z. L. Wang, H. Kriegs and S. Wiegand, *J. Phys. Chem. B*, 2012, 116, 7463-7469.
3. J.-M. Saveant, *Elements Molecular and Biomolecular Electrochemistry*, John Wiley and Son, 2002.
